# Supplementary material
Source: publisher figshare collection journal article supplement (https://gsapubs.figshare.com/ndownloader/files/38176026)
Supplement: Supplementary file 1 [file 38176026]

## Sheet: Sheet1
Input Thermochronological Data
Model Run Name	Original Vertical Profile							Original Vertical Profile w/lowest sample removed						Original Vertical Profile w/highest sample removed						Highest & lowest samples from original profile
Sample Name	15MTP-01	84MP05	84MP03	15MTP-02	15MTP-03	15MTP-04	15MTP-05	84MP05	84MP03	15MTP-02	15MTP-03	15MTP-04	15MTP-05	15MTP-01	84MP05	84MP03	15MTP-02	15MTP-03	15MTP-04	15MTP-01	15MTP-05
Individual/multi-sample/profile model	Profile							Profile						Profile						Profile
(e.g.) AFT Data	No	No	No	No	No	No	No	No	No	No	No	No	No	No	No	No	No	No	No	No	No
# Single Grains	-	-	-	-	-	-	-	-	-	-	-	-	-	-	-	-	-	-	-	-	-
# HCT Lengths	-	-	-	-	-	-	-	-	-	-	-	-	-	-	-	-	-	-	-	-	-
Dpar	-	-	-	-	-	-	-	-	-	-	-	-	-	-	-	-	-	-	-	-	-
(e.g.) Apatite (U-Th)/He (#)	Yes	Yes	Yes	Yes	Yes	Yes	Yes	Yes	Yes	Yes	Yes	Yes	Yes	Yes	Yes	Yes	Yes	Yes	Yes	Yes	Yes
# Single Grains	4	4	5	5	5	4	7	4	5	5	5	4	7	4	4	5	5	5	4	4	7
(e.g.) Zircon (U-Th)/He (#)	No	No	No	No	No	No	No	No	No	No	No	No	No	No	No	No	No	No	No	No	No
# Single Grains	-	-	-	-	-	-	-	-	-	-	-	-	-	-	-	-	-	-	-	-	-
General ranges for prior, additional constraints, temperature offset
General prior range
Time (Ma)	33±33							33±33						33±33						33±33
Temperature (°C)	70±70							70±70						70±70						70±70
Comment	Default rages applied by QTQt version 5.6.2							Default rages applied by QTQt version 5.6.2						Default rages applied by QTQt version 5.6.2						Default rages applied by QTQt version 5.6.2
Constraint #1
Time (Ma)	--	--	--	--	--	--	--	--	--	--	--	--	--	--	--	--	--	--	--	--	--
Temperature (°C)	--	--	--	--	--	--	--	--	--	--	--	--	--	--	--	--	--	--	--	--	--
Comment	--	--	--	--	--	--	--	--	--	--	--	--	--	--	--	--	--	--	--	--	--
Temperature offset of profile samples
Palaeo-temperature offset (°C)/Geothermal gradient (°C/km)	30±1°C/km							30±1°C/km						30±1°C/km						30±1°C/km
Present-day temperature offset (°C)/Geothermal gradient (°C/km)	7±3°C/km							7±3°C/km						7±3°C/km						7±3°C/km
Offset allowed to vary over time?	No							No						No						No
System-and model-specific parameters
Modelling software (and version)	QTQt (Version 5.7.1) (Gallagher, 2012)							QTQt (Version 5.7.1) (Gallagher, 2012)						QTQt (Version 5.7.1) (Gallagher, 2012)						QTQt (Version 5.7.1) (Gallagher, 2012)
FT annealing model
FT annealing model	-							-						-						-
C-axis projection	-							-						-						-
Compositional parameter	-							-						-						-
Etchant	-							-						-						-
Apatite He Kinetic Model
Radiation Damage	Flowers et al. (2009)							Flowers et al. (2009)						Flowers et al. (2009)						Flowers et al. (2009)
comments on RD model used	model used in original study							model used in original study						model used in original study						model used in original study
Additional parameters	-							-						-						-
Alpha-ejection	input ages uncorrected							input ages uncorrected						input ages uncorrected						input ages uncorrected
Resampling of data?	Resampling of observed ages*							Resampling of observed ages*						Resampling of observed ages*						Resampling of observed ages*
Zircon He Kinetic Model
Radiation Damage	-							-						-						-
comments on RD model used	-							-						-						-
Additional parameters	-							-						-						-
Alpha-ejection
Resampling of data?	-							-						-						-
# Iterations
Burn in	50000							50000						50000						50000
Post-Burn in	200000							200000						200000						200000
Comments
MCMC parameters
Acceptance Rates
time & temperature	0.0832 & 0.3853							0.0701 & 0.3588						0.1203 & 0.3812						0.1304 &0.4410
birth & death	0.0140 & 0.0141							0.009 & 0.009						0.0178 & 0.0179						0.0258 & 0.257
Comments	time acceptance rate is low, birth and death rates similar							time acceptance rate is low, birth and death rates similar						time acceptance rate is low, birth and death rates similar						time acceptance rate is low, birth and death rates
	convergence of likelihood chains,							convergence of likelihood chains,						convergence of likelihood chains,						similar, convergence of likelihood chains
Data fit assessment	visual plot inspection of obs. vs. pred. ages							visual plot inspection of obs. vs. pred. ages						visual plot inspection of obs. vs. pred. ages						visual plot inspection of obs. vs. pred. ages
Model used for interpretation	Expected							Expected						Expected						Expected
Comments	most commonly recommended (Gallagher, 2012)							most commonly recommended (Gallagher, 2012)						most commonly recommended (Gallagher, 2012)						most commonly recommended (Gallagher, 2012)
*Footnote 1	Choice for original study							Choice for original study						Choice for original study						Choice for original study
